# Supplementary material
Source: MDPI journal article supplement (https://www.mdpi.com/2410-3888/7/4/205)
Supplement: s1 [file s1]

Table S1: List of Exposure Factors, Biological attributes and Non-climatic Stressors using in assessing the vulnerability of the *C. tulipa* to climate change modified after [ From 45].

| Climatic Factor/Biological Attribute | Goal                                                                                                                | Low Score               | High Score               |
|--------------------------------------|---------------------------------------------------------------------------------------------------------------------|-------------------------|--------------------------|
| Climatic Factors                     |                                                                                                                     |                         |                          |
| Mean Air Temperature                 | To determine if there are changes in mean air temperature by comparing the 1986–2005 to 2006–2055 periods           | Low magnitude of change | High magnitude of Change |
| Mean Precipitation                   | To determine if there are changes in mean precipitation comparing the 1986–2005 to 2006–2055 periods                | Low magnitude of change | High magnitude of Change |
| Mean Estuarine Temperature           | To determine if there are changes in mean estuarine temperature comparing the 1986–2005 to 2006–2055 periods        | Low magnitude of change | High magnitude of Change |
| Mean Estuarine pH                    | To determine if there are changes in mean estuarine pH comparing the 1986–2005 to 2006–2055 periods                 | Low magnitude of change | High magnitude of Change |
| Mean Estuarine Salinity              | To determine if there are changes in mean Air temperature comparing the 1986–2005 to 2006–2055 periods              | Low magnitude of change | High magnitude of Change |
| Mean Surface Runoff                  | To determine if there are changes in mean surface run-off comparing the 1986–2005 to 2006–2055 periods              | Low magnitude of change | High magnitude of Change |
| Mean River Flow                      | To determine if there are changes in mean river flow comparing the 1986–2005 to 2006–2055 periods                   | Low magnitude of change | High magnitude of Change |
| Variability in Air Temperature       | To determine if there are changes in variability of air temperature comparing the 1986–2005 to 2006–2055 periods    | Low magnitude of change | High magnitude of Change |
| Variability in Estuarine Temperature | To determine if there are changes in estuarine temperature variability comparing the 1986–2005 to 2006–2055 periods | Low magnitude of change | High magnitude of Change |
| Variability in Precipitation         | To determine if there are changes in precipitation variability comparing the 1986–2005 to 2006–2055 periods         | Low magnitude of change | High magnitude of Change |
| Variability in Estuarine Salinity    | To determine if there are changes in estuarine salinity variability comparing the 1986–2005 to 2006–2055 periods    | Low magnitude of change | High magnitude of Change |
| Variability in Estuarine pH          | To determine if there are changes in estuarine pH variability comparing the 1986–2005 to 2006–2055 periods          | Low magnitude of change | High magnitude of Change |

|                                                        |                                                                                                                                                                                                 |                                    |                                       |
|--------------------------------------------------------|-------------------------------------------------------------------------------------------------------------------------------------------------------------------------------------------------|------------------------------------|---------------------------------------|
| Variability in Surface Run-off                         | To determine if there are changes in surface run-off variability comparing the 1986–2005 to 2006–2055 periods                                                                                   | Low magnitude of change            | High magnitude of Change              |
| Variability in River Flow                              | To determine if there are changes in surface run-off variability comparing the 1986–2005 to 2006–2055 periods                                                                                   | Low magnitude of change            | High magnitude of Change              |
| Sea Level Rise                                         | To evaluate the magnitude of sea level, rise relative to the ability of nearshore habitats to change                                                                                            | Low magnitude of change            | High magnitude of Change              |
| Estuarine Currents                                     | To evaluate changes in large-scale circulation.                                                                                                                                                 | Low magnitude of change            | High magnitude of Change              |
| Ocean Acidification                                    | To determine if there are changes in ocean pH (global) by comparing 1986-2005 to 2006-2055                                                                                                      | Low magnitude of change            | High magnitude of Change              |
| Ocean Acidification                                    | To determine if there are changes in ocean alkalinity (global) by comparing 1986-2005 to 2006-2055                                                                                              | Low magnitude of Change            | High magnitude of Change              |
| Ocean Acidification                                    | To determine if there are changes in ocean dissolved inorganic carbon (DIC) (global) by comparing 1986-2005 to 2006-2055                                                                        | Low magnitude of Change            | High magnitude of Change              |
| <b>Biological Attributes</b>                           |                                                                                                                                                                                                 |                                    |                                       |
| Prey Specificity                                       | To determine, on a relative scale, if the stock is a prey generalist or a prey specialist                                                                                                       | Prey Generalist                    | Prey Specialist                       |
| Habitat specificity                                    | To determine, on a relative scale, if the stock is a habitat generalist or a habitat specialist while incorporating information on the type and abundance of key habitats                       | Habitat Generalist                 | Habitat Specialist                    |
| Sensitivity to Ocean Acidification                     | To estimate the stock's sensitivity to ocean acidification                                                                                                                                      | Sensitive Taxa                     | Insensitive Taxa                      |
| Complexity in Reproduction strategy                    | To determine how complex the stock's reproductive strategy is and how dependent reproductive success is on specific environmental conditions                                                    | Low Complexity: Broadcast Spawning | High complexity: Aggregate Spawning   |
| Sensitivity to Temperature                             | To use the distribution of the species as proxy for its sensitivity to temperature.                                                                                                             | Broad thermal limits               | Narrow thermal limits                 |
| Early Life History Survival and Settlement Requirement | To determine the relative importance of early life history requirements of the stock                                                                                                            | Generalist with few requirements   | Specialist with specific requirements |
| Stock Size Status                                      | To estimate stock status to clarify how much stress from fishing the stock is experiencing and to determine if the stock's resilience or adaptive capacity are compromised due to its abundance | High Abundance                     | Low Abundance                         |
| Other Stressors-pollution                              | To account for conditions that could increase the stress on the stock and thus decrease its ability to respond to changes.                                                                      | Low Level of Stressors             | High Level of Stressors               |

|                                |                                                                                                                                                                                           |                        |                       |
|--------------------------------|-------------------------------------------------------------------------------------------------------------------------------------------------------------------------------------------|------------------------|-----------------------|
| Population Growth Rate         | To estimate the relative productivity of the stock                                                                                                                                        | High Population Growth | Low Population Growth |
| Dispersal of Early Life Stages | To estimate the ability of the stock to colonize new habitats when or if their current habitat becomes less suitable                                                                      | High Dispersal         | Low Dispersal         |
| Adult Mobility                 | To estimate the ability of the stock to move to a new location if their current location changes and is no longer favorable for growth and/or survival                                    | High Mobility          | Low Mobility          |
| Spawning                       | To determine if the duration of the spawning cycle for the stock could limit the ability of the stock to successfully reproduce, if necessary, conditions are disrupted by climate change | Year-round             | One-event per Year.   |
