# Supplementary material
Source: MDPI journal article supplement (https://www.mdpi.com/2410-3888/7/4/205)
Supplement: s1 [file s1]

## SCORING SHEET FOR THE ASSESSMENT OF THE VULNERABILITY OF THE *C.TULIPA* TO CLIMATE CHANGE

### Instructions

Scoring Guideline: The Scoring guideline is attached for your reference

Scoring Process: You have a total of 5 scores for allocated each attribute. The score can be spread in the individual bins based on your level of confidence. For example, if you are 95+ percent confident that the oysters are prey specific, you can put all your 5 points in the very high bin. If you are not 95+ percent confident, you can spread the scores across the bins based on your level of confidence.

Scoring Climatic Factors. Scoring should be based on regional models of climate data considering Observed and Predicted data provided.

Scoring Biological Attributes: Please use your expert knowledge on the West African Mangrove Oyster in addition to the species profile developed during our workshop.

Table S2: Scoring Sheet for Assessing of the Vulnerability of the *C.tulipa* to Climate Change [From 45]

| Attribute                  | EXPERT SCORE |          |      |           | Data Quality<br>Score (3,2,1,0) |
|----------------------------|--------------|----------|------|-----------|---------------------------------|
|                            | Low          | Moderate | High | Very High |                                 |
| CLIMATIC FACTORS           |              |          |      |           |                                 |
| Mean Air Temperature       |              |          |      |           |                                 |
| Mean Precipitation         |              |          |      |           |                                 |
| Mean Estuarine Temperature |              |          |      |           |                                 |
| Mean Estuarine pH          |              |          |      |           |                                 |
| Mean Estuarine Salinity    |              |          |      |           |                                 |
| Mean Surface Runoff        |              |          |      |           |                                 |
| Mean River Flow            |              |          |      |           |                                 |

|                                                        |  |  |  |  |  |
|--------------------------------------------------------|--|--|--|--|--|
| Variability in Air Temperature                         |  |  |  |  |  |
| Variability in Estuarine Temperature                   |  |  |  |  |  |
| Variability in Precipitation                           |  |  |  |  |  |
| Variability in Estuarine Salinity                      |  |  |  |  |  |
| Variability in Estuarine pH                            |  |  |  |  |  |
| Variability in Surface Run-off                         |  |  |  |  |  |
| Variability in River Flow                              |  |  |  |  |  |
| Sea Level Rise                                         |  |  |  |  |  |
| Estuarine Currents                                     |  |  |  |  |  |
| Ocean Acidification                                    |  |  |  |  |  |
| Ocean Acidification                                    |  |  |  |  |  |
| Ocean Acidification                                    |  |  |  |  |  |
| <b>BIOLOGICAL ATTRIBUTES</b>                           |  |  |  |  |  |
| Prey Specificity                                       |  |  |  |  |  |
| Habitat specificity                                    |  |  |  |  |  |
| Sensitivity to Ocean Acidification                     |  |  |  |  |  |
| Complexity in Reproduction strategy                    |  |  |  |  |  |
| Sensitivity to Temperature                             |  |  |  |  |  |
| Early Life History Survival and Settlement Requirement |  |  |  |  |  |

|                                   |  |  |  |  |  |
|-----------------------------------|--|--|--|--|--|
| Stock Size Status                 |  |  |  |  |  |
| Other Stressors-<br>pollution     |  |  |  |  |  |
| Population<br>Growth Rate         |  |  |  |  |  |
| Dispersal of<br>Early Life Stages |  |  |  |  |  |
| Adult Mobility                    |  |  |  |  |  |
| Spawning                          |  |  |  |  |  |
