# Supplementary material
Source: MDPI journal article supplement (https://www.mdpi.com/2410-3888/7/4/205)
Supplement: s1 [file s1]

Archive with 3 entries (3 files):
- Mahu et al _Supplementary Table S1.pdf
- Mahu et al _Supplementary Table S2.pdf
- Mahu et al _Supplementary Table S3.xlsx
