# Supplementary material
Source: MDPI journal article supplement (https://www.mdpi.com/2410-3888/7/4/205)
Supplement: s1 [file s1 › Mahu et al _Supplementary Table S3.xlsx]

## Sheet: Attribute Scores
Attributes		Low	Moderate	High	Very High
Mean Air Temperature	E1	0	0	1	3
Mean Air Temperature	E2	0	0	0	5
Mean Air Temperature	E3	0	0	0	5
Mean Air Temperature	E4	0	0	5	0
Mean Air Temperature	E5	0	3	2	0
Mean Air Temperature	E6	0	0	1	4
Mean Air Temperature	E7	0	0	5	0
Mean Air Temperature	E8	0	0	5	0
Mean Air Temperature	E9	0	0	5	0
Mean Precipitation	E1	0	0	2	3
Mean Precipitation	E2	0	0	0	5
Mean Precipitation	E3	0	0	0	5
Mean Precipitation	E4	0	0	5	0
Mean Precipitation	E5	0	0	5	0
Mean Precipitation	E6	0	0	1	4
Mean Precipitation	E7	0	5	0	0
Mean Precipitation	E8	0	0	5	0
Mean Precipitation	E9	0	0	5	0
Mean Estuary Temperature	E1	0	0	0	5
Mean Estuary Temperature	E2	0	0	2	3
Mean Estuary Temperature	E3	0	0	0	5
Mean Estuary Temperature	E4	0	5	0	0
Mean Estuary Temperature	E5	0	0	5	0
Mean Estuary Temperature	E6	0	0	0	5
Mean Estuary Temperature	E7	3	2	0	0
Mean Estuary Temperature	E8	0	3	2	0
Mean Estuary Temperature	E9	0	0	5	0
Mean Estuarine pH	E1	0	0	2	3
Mean Estuarine pH	E2	2	3	0	0
Mean Estuarine pH	E3	0	0	2	3
Mean Estuarine pH	E4	0	5	0	0
Mean Estuarine pH	E5	2	3	0	0
Mean Estuarine pH	E6	0	0	2	3
Mean Estuarine pH	E7	0	0	3	2
Mean Estuarine pH	E8	0	0	0	5
Mean Estuarine pH	E9	0	0	0	5
Mean Estuarine Salinity	E1	0	0	0	5
Mean Estuarine Salinity	E2	0	0	3	2
Mean Estuarine Salinity	E3	0	0	0	5
Mean Estuarine Salinity	E4	0	5	0	0
Mean Estuarine Salinity	E5	0	0	0	5
Mean Estuarine Salinity	E6	0	0	0	5
Mean Estuarine Salinity	E7	0	0	3	2
Mean Estuarine Salinity	E8	0	2	3	0
Mean Estuarine Salinity	E9	0	2	3	0
Mean Surface Runoff	E1	0	0	4	1
Mean Surface Runoff	E2	0	0	3	2
Mean Surface Runoff	E3	0	0	3	2
Mean Surface Runoff	E4	0	2	3	0
Mean Surface Runoff	E5	0	0	3	2
Mean Surface Runoff	E6	0	2	3	0
Mean Surface Runoff	E7	2	3	0	0
Mean Surface Runoff	E8	0	2	3	0
Mean Surface Runoff	E9	0	2	3	0
Mean River Flow	E1	0	0	1	5
Mean River Flow	E2	0	0	2	3
Mean River Flow	E3	0	0	0	5
Mean River Flow	E4	0	0	1	4
Mean River Flow	E5	2	3	0	0
Mean River Flow	E6	0	0	1	4
Mean River Flow	E7	0	5	0	0
Mean River Flow	E8	0	2	3	0
Mean River Flow	E9	0	2	3	0
Variability in Air Temperature	E1	0	0	2	3
Variability in Air Temperature	E2	0	0	2	3
Variability in Air Temperature	E3	0	0	0	5
Variability in Air Temperature	E4	0	0	5	0
Variability in Air Temperature	E5	2	3	0	0
Variability in Air Temperature	E6	0	0	2	3
Variability in Air Temperature	E7	0	0	3	2
Variability in Air Temperature	E8	0	0	5	0
Variability in Air Temperature	E9	0	0	5	0
Variability in Estuarine Temperature	E1	0	0	3	2
Variability in Estuarine Temperature	E2	0	0	2	3
Variability in Estuarine Temperature	E3	0	0	3	2
Variability in Estuarine Temperature	E4	0	5	0	0
Variability in Estuarine Temperature	E5	0	1	4	0
Variability in Estuarine Temperature	E6	0	0	3	2
Variability in Estuarine Temperature	E7	0	0	3	2
Variability in Estuarine Temperature	E8	0	0	5	0
Variability in Estuarine Temperature	E9	0	0	5	0
Variabiity in Precipiation	E1	0	0	4	1
Variabiity in Precipiation	E2	0	0	2	3
Variabiity in Precipiation	E3	0	0	0	5
Variabiity in Precipiation	E4	0	0	0	5
Variabiity in Precipiation	E5	0	0	0	5
Variabiity in Precipiation	E6	0	0	0	5
Variabiity in Precipiation	E7	2	3	0	0
Variabiity in Precipiation	E8	0	0	5	0
Variabiity in Precipiation	E9	0	0	5	0
Variabiity in Salinity	E1	0	0	0	5
Variabiity in Salinity	E2	0	0	0	5
Variabiity in Salinity	E3	0	0	0	5
Variabiity in Salinity	E4	0	0	5	0
Variabiity in Salinity	E5	0	0	0	5
Variabiity in Salinity	E6	0	0	0	5
Variabiity in Salinity	E7	0	0	1	4
Variabiity in Salinity	E8	0	2	3	0
Variabiity in Salinity	E9	0	2	3	0
Variability in Estuarine pH	E1	0	0	1	4
Variability in Estuarine pH	E2	2	2	1	0
Variability in Estuarine pH	E3	0	0	0	5
Variability in Estuarine pH	E4	0	5	0	0
Variability in Estuarine pH	E5	5	0	0	0
Variability in Estuarine pH	E6	0	0	1	4
Variability in Estuarine pH	E7	0	2	3	0
Variability in Estuarine pH	E8	0	0	5	0
Variability in Estuarine pH	E9	0	0	5	0
Variability in Surface Run-off	E1	0	1	3	1
Variability in Surface Run-off	E2	0	0	3	2
Variability in Surface Run-off	E3	0	0	3	2
Variability in Surface Run-off	E4	0	0	0	5
Variability in Surface Run-off	E5	0	0	5	0
Variability in Surface Run-off	E6	0	2	2	1
Variability in Surface Run-off	E7	4	1	0	0
Variability in Surface Run-off	E8	0	2	3	0
Variability in Surface Run-off	E9	0	2	3	0
Variability in River Flow	E1	0	0	1	4
Variability in River Flow	E2	0	0	3	2
Variability in River Flow	E3	0	0	0	5
Variability in River Flow	E4	0	0	5	0
Variability in River Flow	E5	0	3	2	0
Variability in River Flow	E6	0	0	1	4
Variability in River Flow	E7	3	2	0	0
Variability in River Flow	E8	0	2	3	0
Variability in River Flow	E9	0	2	3	0
Sea Level Rise	E1	0	0	1	4
Sea Level Rise	E2	0	0	0	5
Sea Level Rise	E3	0	0	0	5
Sea Level Rise	E4	0	0	5	0
Sea Level Rise	E5	0	0	2	3
Sea Level Rise	E6	0	0	1	4
Sea Level Rise	E7	0	0	1	4
Sea Level Rise	E8	0	0	5	0
Sea Level Rise	E9	0	0	5	0
Estuarine Currents	E1	0	2	3	0
Estuarine Currents	E2	0	3	2	0
Estuarine Currents	E3	0	3	2	0
Estuarine Currents	E4	0	0	5	0
Estuarine Currents	E5	0	2	3	0
Estuarine Currents	E6	0	2	3	0
Estuarine Currents	E7	0	0	1	4
Estuarine Currents	E8	0	2	3	0
Estuarine Currents	E9	0	2	3	0
Ocean Acidification	E1	0	0	2	3
Ocean Acidification	E2	0	5	0	0
Ocean Acidification	E3	0	0	0	5
Ocean Acidification	E4	0	5	0	0
Ocean Acidification	E5	0	0	3	2
Ocean Acidification	E6	0	0	2	3
Ocean Acidification	E7	0	0	0	5
Ocean Acidification	E8	0	0	0	5
Ocean Acidification	E9	0	0	0	5
Prey Specificity	E1	0	3	2	0
Prey Specificity	E2	0	0	0	5
Prey Specificity	E3	0	3	2	0
Prey Specificity	E4	0	3	2	0
Prey Specificity	E5	0	0	1	4
Prey Specificity	E6	0	3	2	0
Prey Specificity	E7	0	0	3	2
Prey Specificity	E8	0	0	5	0
Prey Specificity	E9	0	0	5	0
Habitat Specificity	E1	0	2	3	0
Habitat Specificity	E2	0	0	0	5
Habitat Specificity	E3	0	2	3	0
Habitat Specificity	E4	0	2	3	0
Habitat Specificity	E5	0	0	5	0
Habitat Specificity	E6	0	2	3	0
Habitat Specificity	E7	0	0	0	5
Habitat Specificity	E8	0	0	0	5
Habitat Specificity	E9	0	0	0	5
Sensitivity to Ocean Acidification	E1	0	0	2	3
Sensitivity to Ocean Acidification	E2	0	0	0	5
Sensitivity to Ocean Acidification	E3	0	0	5	0
Sensitivity to Ocean Acidification	E4	0	0	5	0
Sensitivity to Ocean Acidification	E5	0	0	5	0
Sensitivity to Ocean Acidification	E6	0	0	2	3
Sensitivity to Ocean Acidification	E7	3	2	0	0
Sensitivity to Ocean Acidification	E8	0	0	0	5
Sensitivity to Ocean Acidification	E9	0	0	0	5
Complexity in Reproduction Strategy	E1	0	3	2	0
Complexity in Reproduction Strategy	E2	5	0	0	0
Complexity in Reproduction Strategy	E3	5	0	0	0
Complexity in Reproduction Strategy	E4	5	0	0	0
Complexity in Reproduction Strategy	E5	0	0	5	0
Complexity in Reproduction Strategy	E6	0	4	1	0
Complexity in Reproduction Strategy	E7	0	0	4	1
Complexity in Reproduction Strategy	E8	0	0	5	0
Complexity in Reproduction Strategy	E9	0	0	5	0
Sensitivity to Salinity	E1	0	1	1	3
Sensitivity to Salinity	E2	0	0	2	3
Sensitivity to Salinity	E3	0	0	1	4
Sensitivity to Salinity	E4	0	0	1	4
Sensitivity to Salinity	E5	0	0	2	3
Sensitivity to Salinity	E6	0	0	0	5
Sensitivity to Salinity	E7	0	0	0	5
Sensitivity to Salinity	E8	0	0	2	3
Sensitivity to Salinity	E9	0	0	2	3
Sensitivity to Temperature	E1	0	0	2	3
Sensitivity to Temperature	E2	2	3	0	0
Sensitivity to Temperature	E3	5	0	0	0
Sensitivity to Temperature	E4	5	0	0	0
Sensitivity to Temperature	E5	0	3	2	0
Sensitivity to Temperature	E6	0	4	1	0
Sensitivity to Temperature	E7	0	0	0	5
Sensitivity to Temperature	E8	5	0	0	0
Sensitivity to Temperature	E9	5	0	0	0
Early Life History Survival and Settlement Requirements	E1	0	0	2	3
Early Life History Survival and Settlement Requirements	E2	0	0	0	5
Early Life History Survival and Settlement Requirements	E3	0	0	3	2
Early Life History Survival and Settlement Requirements	E4	0	0	3	2
Early Life History Survival and Settlement Requirements	E5	0	0	2	3
Early Life History Survival and Settlement Requirements	E6	0	0	3	2
Early Life History Survival and Settlement Requirements	E7	0	0	5	0
Early Life History Survival and Settlement Requirements	E8	0	0	0	5
Early Life History Survival and Settlement Requirements	E9	0	0	0	5
Stock Size/Status	E1	0	3	2	0
Stock Size/Status	E2	3	2	0	0
Stock Size/Status	E3	0	5	0	0
Stock Size/Status	E4	0	5	0	0
Stock Size/Status	E5	0	5	0	0
Stock Size/Status	E6	0	4	1	0
Stock Size/Status	E7	0	0	0	5
Stock Size/Status	E8	0	3	2	0
Stock Size/Status	E9	0	3	2	0
Other Stressors-Pollution	E1	0	2	3	0
Other Stressors-Pollution	E2	0	0	0	5
Other Stressors-Pollution	E3	0	0	5	0
Other Stressors-Pollution	E4	0	0	5	0
Other Stressors-Pollution	E5	0	0	0	5
Other Stressors-Pollution	E6	0	1	4	0
Other Stressors-Pollution	E7	4	1	0	0
Other Stressors-Pollution	E8	0	0	3	2
Other Stressors-Pollution	E9	0	0	3	2
Population Growth Rate	E1	0	2	3	0
Population Growth Rate	E2	5	0	0	0
Population Growth Rate	E3	5	0	0	0
Population Growth Rate	E4	5	0	0	0
Population Growth Rate	E5	2	3	0	0
Population Growth Rate	E6	4	1	0	0
Population Growth Rate	E7	0	2	3	0
Population Growth Rate	E8	2	3	0	0
Population Growth Rate	E9	2	3	0	0
Dispersal of Early Life Stages	E1	0	3	2	0
Dispersal of Early Life Stages	E2	0	0	0	5
Dispersal of Early Life Stages	E3	3	0	2	0
Dispersal of Early Life Stages	E4	3	2	0	0
Dispersal of Early Life Stages	E5	0	5	0	0
Dispersal of Early Life Stages	E6	0	3	2	0
Dispersal of Early Life Stages	E7	0	0	0	5
Dispersal of Early Life Stages	E8	0	5	0	0
Dispersal of Early Life Stages	E9	0	5	0	0
Adult Mobility	E1	0	0	2	3
Adult Mobility	E2	0	0	0	5
Adult Mobility	E3	0	0	0	5
Adult Mobility	E4	0	0	0	5
Adult Mobility	E5	0	0	0	5
Adult Mobility	E6	0	0	1	4
Adult Mobility	E7	0	2	3	0
Adult Mobility	E8	0	0	0	5
Adult Mobility	E9	0	0	0	5
Spawning	E1	0	3	2	0
Spawning	E2	5	0	0	0
Spawning	E3	5	0	0	0
Spawning	E4	5	0	0	0
Spawning	E5	0	0	0	5
Spawning	E6	0	5	0	0
Spawning	E7	0	0	2	3
Spawning	E8	0	0	4	1
Spawning	E9	0	0	4	1

## Sheet: Distribution Change Scores
Attribute		Low	Moderate	High	Very High
Sensitivity to Salinity	E1	0	1	1	3
Sensitivity to Salinity	E2	0	0	2	3
Sensitivity to Salinity	E3	0	0	1	4
Sensitivity to Salinity	E4	0	0	1	4
Sensitivity to Salinity	E5	0	0	2	3
Sensitivity to Salinity	E6	0	0	0	5
Sensitivity to Salinity	E7	0	0	0	5
Sensitivity to Salinity	E8	0	0	2	3
Sensitivity to Salinity	E9	0	0	2	3
Sensitivity to Temperature	E1	0	0	2	3
Sensitivity to Temperature	E2	2	3	0	0
Sensitivity to Temperature	E3	5	0	0	0
Sensitivity to Temperature	E4	5	0	0	0
Sensitivity to Temperature	E5	0	3	2	0
Sensitivity to Temperature	E6	0	4	1	0
Sensitivity to Temperature	E7	0	0	0	5
Sensitivity to Temperature	E8	5	0	0	0
Sensitivity to Temperature	E9	5	0	0	0
Habitat Specificity	E1	0	2	3	0
Habitat Specificity	E2	0	0	0	5
Habitat Specificity	E3	0	2	3	0
Habitat Specificity	E4	0	2	3	0
Habitat Specificity	E5	0	0	5	0
Habitat Specificity	E6	0	2	3	0
Habitat Specificity	E7	0	0	0	5
Habitat Specificity	E8	0	0	0	5
Habitat Specificity	E9	0	0	0	5
Dispersal of Early Life Stages	E1	3	2	0	0
Dispersal of Early Life Stages	E2	5	0	0	0
Dispersal of Early Life Stages	E3	3	0	2	0
Dispersal of Early Life Stages	E4	3	2	0	0
Dispersal of Early Life Stages	E5	0	5	0	0
Dispersal of Early Life Stages	E6	0	3	2	0
Dispersal of Early Life Stages	E7	5	0	0	0
Dispersal of Early Life Stages	E8	0	5	0	0
Dispersal of Early Life Stages	E9	0	5	0	0
Adult Mobility	E1	3	2	0	0
Adult Mobility	E2	5	0	0	0
Adult Mobility	E3	5	0	0	0
Adult Mobility	E4	5	0	0	0
Adult Mobility	E5	5	0	0	0
Adult Mobility	E6	4	2	0	0
Adult Mobility	E7	3	2	0	0
Adult Mobility	E8	5	0	0	0
Adult Mobility	E9	5	0	0	0

## Sheet: Directional Effect of CC Scores
Expert	Negative	Neutral	Positive
E1	3	0	1
E2	2	1	1
E3	3	0	1
E4	2	1	1
E5	3	0	1
E6	3	0	1
E7	2	1	1
E8	4	0	0
E9	3	0	1
